# Supplementary material for: Differential role of PVP on the synthesis of plasmonic gold nanostructures and their catalytic and SERS properties
Source: Royal Society of Chemistry journal article supplement (doi:10.1039/c6ra18345j), 2016-01-01
Supplement: c6ra18345j1.pdf [file c6ra18345j1.pdf]

## Differential role of PVP on the synthesis of plasmonic gold nanostructures and their Catalytic and SERS properties

**Manoj Verma, Abhitosh Kedia<sup>1</sup>, M.Boazbou Newmai, P. Senthil Kumar\*\*<sup>a</sup>**

*Department of Physics & Astrophysics, University of Delhi, Delhi-110007, India*

*<sup>1</sup>Department of Physics, Uka Tarsadia University, Bardoli, Surat-394350, Gujarat, India*

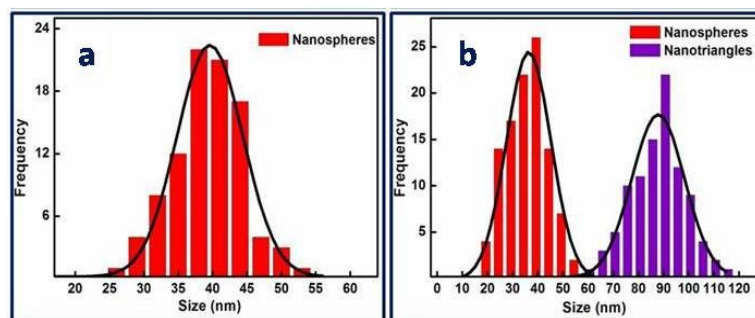

**Fig. S1** Size distribution histogram of (a) nanospheres and (b) nanotriangles synthesized at room temperature.

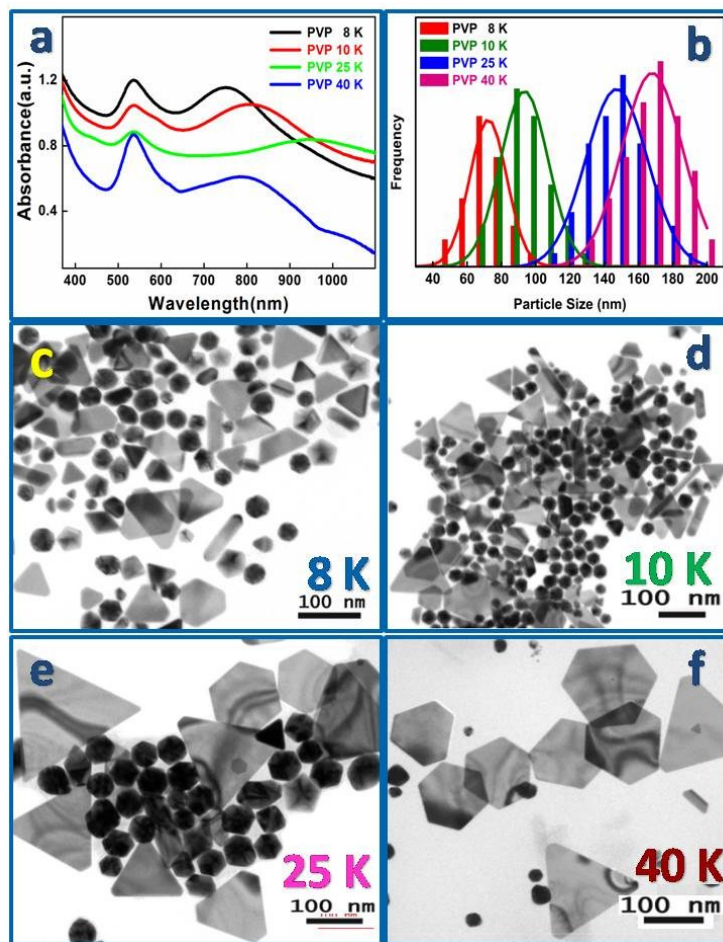

**Fig. S2** (a) and (b) are absorption spectra and size distribution histogram of nanotriangles formed with different molecular weights of PVP. (c-f) are TEM images of nanotriangles formed by using PVP of molecular weight 8k, 10k, 25k and 40k respectively.

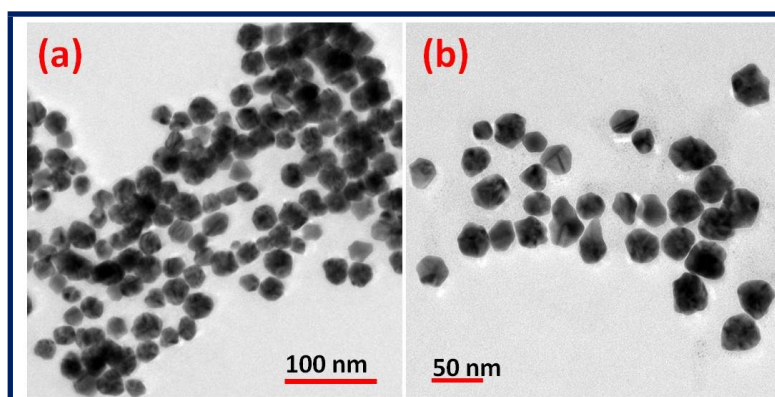

**Fig. S3** TEM images of nanostructures formed with (a) NaCl and (b) NaI.

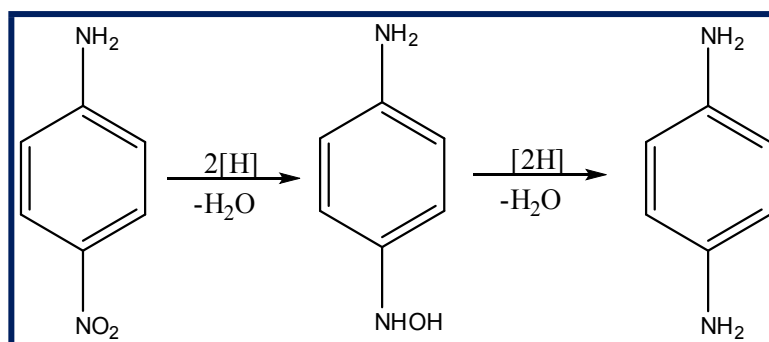

**Fig. S4** Reduction mechanism of 4-nitroaniline to p- para-phenylenediamine by NaBH<sub>4</sub> in the presence of gold nanoparticles.

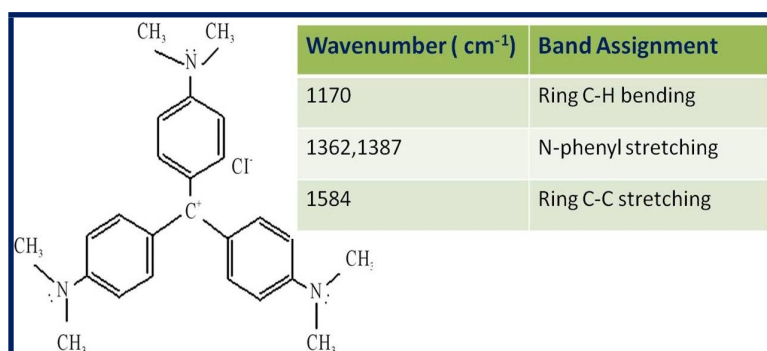

**Fig. S5** Structure of crystal violet and Raman band assignment corresponding to different modes of crystal violet.

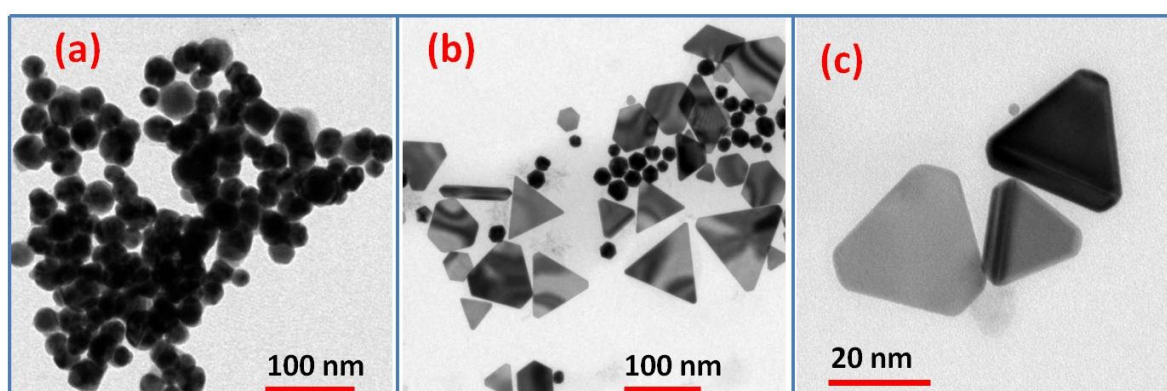

**Fig. S6** The images of (a) spherical (b) large nanotriangles (c) small nanotriangles of Au represents the coupling with crystal violet molecules for SERS studies.

**Table 1:** d values of different crystallographic axes and average crystallite size for different nanoparticles as calculated by the Scherrer formula.

| Au nanoparticles    | d- values of different ( <i>hkl</i> ) planes |                |                | Average          |
|---------------------|----------------------------------------------|----------------|----------------|------------------|
|                     | ( <i>111</i> )                               | ( <i>200</i> ) | ( <i>220</i> ) | Crystallite size |
| Spherical particles | 2.353                                        | 2.041          | 1.442          | 30.5 nm          |
| Large nanotriangles | 2.353                                        | 2.039          | 1.439          | 53.4 nm          |
| Small nanotriangles | 2.352                                        | 2.036          | 1.437          | 21.3 nm          |

**Table 2** Intensity ratios of different crystallographic planes and their strain for different nanoparticles

| Ratio of intensity  | $(200)/(111)$ | $(220)/(111)$ | Strain along different ( <i>hkl</i> ) planes |                |                |
|---------------------|---------------|---------------|----------------------------------------------|----------------|----------------|
|                     |               |               | ( <i>111</i> )                               | ( <i>200</i> ) | ( <i>220</i> ) |
| Spherical particles | 0.250         | 0.128         | 3.40 %                                       | 3.68 %         | 2.98 %         |
| Large nanotriangles | 0.237         | 0.111         | 3.29 %                                       | 3.52 %         | 2.55 %         |
| Small nanotriangles | 0.207         | 0.083         | 3.25 %                                       | 3.08 %         | 1.96 %         |

## Calculation of SERS Enhancement factor for Crystal Violet adsorbed on different Shape/Sized gold nanostructures synthesized:

Average EF of the new substrate that can be defined as

$$EF = (I_{SERS}/N_{Surf})/(I_{RS}/N_{Vol}),$$

where  $N_{Vol} = C_{RS} * V$  is the average number of molecules in the scattering volume (V) at concentration  $C_{RS}$  for the Raman (non-SERS) measurement, and  $N_{Surf}$  is the average number of adsorbed molecules in the scattering volume for the SERS experiments and  $I_{SERS}$  and  $I_{RS}$  denote the integrated intensities for the strongest band of the new surface and solution species. This definition is normally taken as representative of a substrate assuming a monolayer coverage.

To calculate EF, it is necessary to know the number of molecules in the focal area of the microscope for raman and SERS measurement. The drop volume of analyte taken was 10 uL that covers a surface area of about 10 mm<sup>2</sup> and spot area of the laser was calculated from the diameter of the laser spot of 20 um.

$$\text{Area of laser spot } A = \pi \times r^2 = 3.14 \times (10 \text{ um})^2 = 314 \text{ um}^2$$

We can calculate the number of molecules for raman and SERS measurements in the drop considering ,

$$N = \text{Volume} \times \text{Conc.} \times NA$$

$N_{SERS} = (10 \times 10^{-6} \text{ L}) \times (1 \times 10^{-6} \text{ M}) \times (6.022 \times 10^{23}) = 6 \times 10^{12}$  molecules in the drop of SERS substrate.  $N_{RAMAN} = (10 \times 10^{-6} \text{ L}) \times (1 \times 10^{-3} \text{ M}) \times (6.022 \times 10^{23}) = 6 \times 10^{15}$  molecules in the drop of SERS substrate. These molecules are in the drop area but we have to consider the number of molecules in the laser spot so by proportionality we obtain  $N_{Vol} = 1,13 \times 10^{12}$  and  $N_{Surf} = 1,13 \times 10^9$  respectively. Putting the intensities of the peak at 1170 cm<sup>-1</sup> ( $I_{SERS} = 23500$  for small nanotriangles, 12661 for large nanotriangles and 4660 for spherical nanoparticles and  $I_{RS} = 250$  and the number of molecules irradiated in normal Raman and SERS spectra to

the formula  $EF = (I_{SERS}/N_{Surf})/(I_{RS}/N_{Vol})$  we can obtain SERS enhancement factor for different nanostructures.
